# Supplementary material for: A Novel Theranostic Strategy for MMP-14 –Expressing Glioblastomas Impacts Survival
Source: Oxford University Press journal article supplement (doi:10.1158/1535-7163.mct-17-0022), 2017-06-28
Supplement: 15357163mct170022-sup-177031_2_supp_4084453_cr50zw.docx [file 15357163mct170022-sup-177031_2_supp_4084453_cr50zw.docx]

**
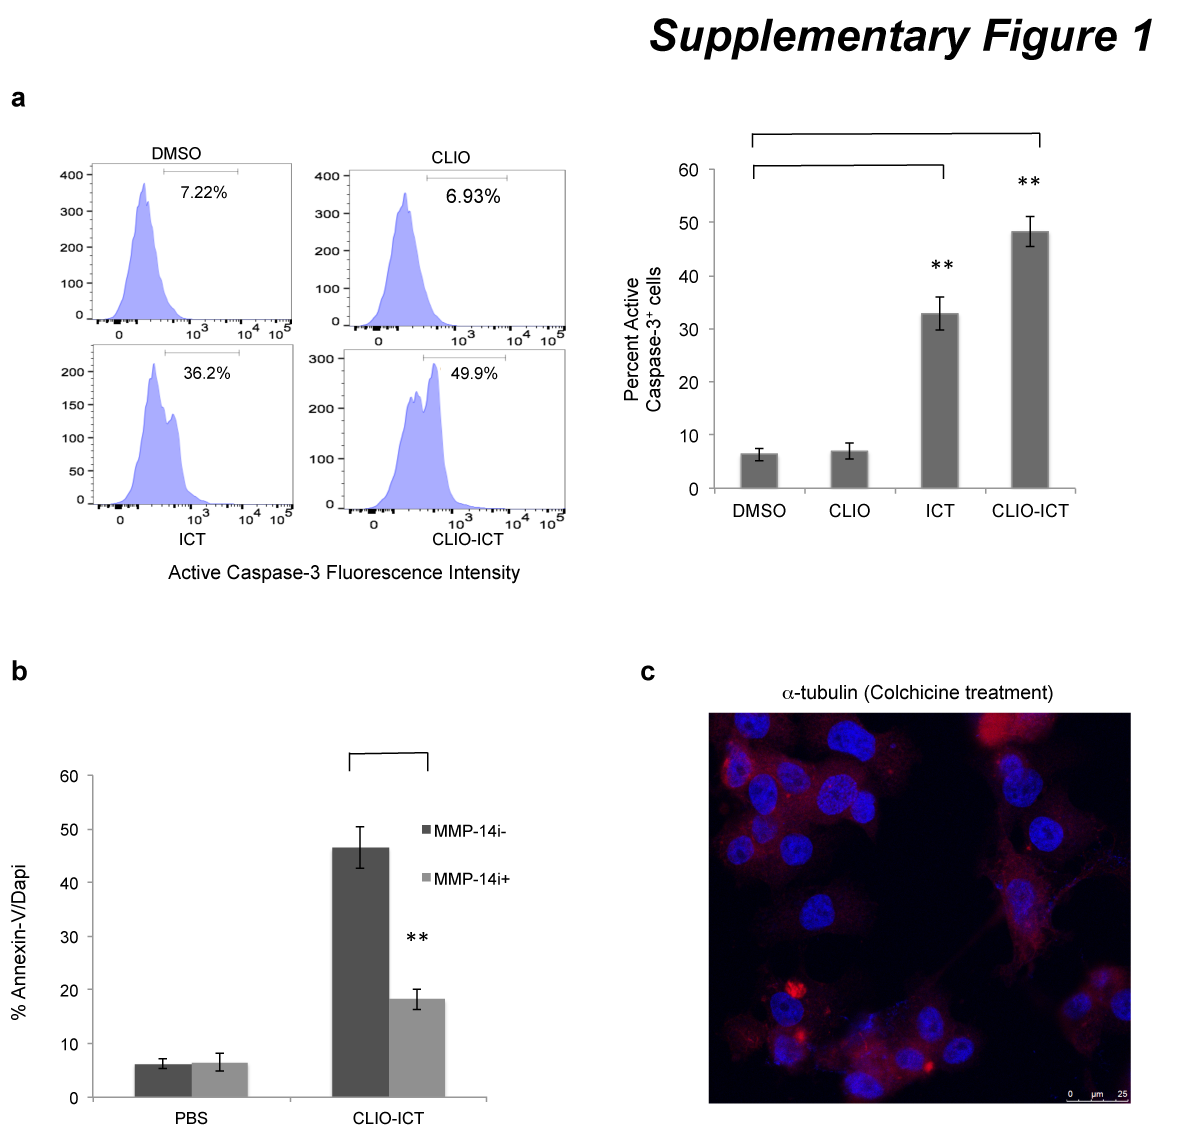
**

**Supplementary figure 1. CLIO-ICTs induce apoptosis in GBM. (a)** Flow cytometry analysis of cleaved caspase-3 expression in pcGBM39 cells treated with CLIO-ICT (10nM), ICT (10nM), CLIO (0.01mM) and DMSO. Cells were treated with indicated doses for 48 hrs and stained for cleaved caspase-3. *P < 0.05, **P < 0.005, One way ANOVA. **(b)** pcGBM39 cells were treated with CLIO-ICT in presence or absence of MMP-14 inhibitor Ilomastat for 48 hrs and subjected to flow cytometry analysis of Annexin-V/DAPI apoptotic staining. **(c)** Immunofluorescence for -tubulin in control and colchicine-treated U87 cells. Results are represented as mean ± SD from three independent experiments. *P < 0.05, two-sided Mann–WhitneyU-test.
