# Supplementary material for: A Novel Theranostic Strategy for MMP-14 –Expressing Glioblastomas Impacts Survival
Source: Oxford University Press journal article supplement (doi:10.1158/1535-7163.mct-17-0022), 2017-06-28
Supplement: 15357163mct170022-sup-177031_2_supp_4084457_zr50zx.docx [file 15357163mct170022-sup-177031_2_supp_4084457_zr50zx.docx]

**
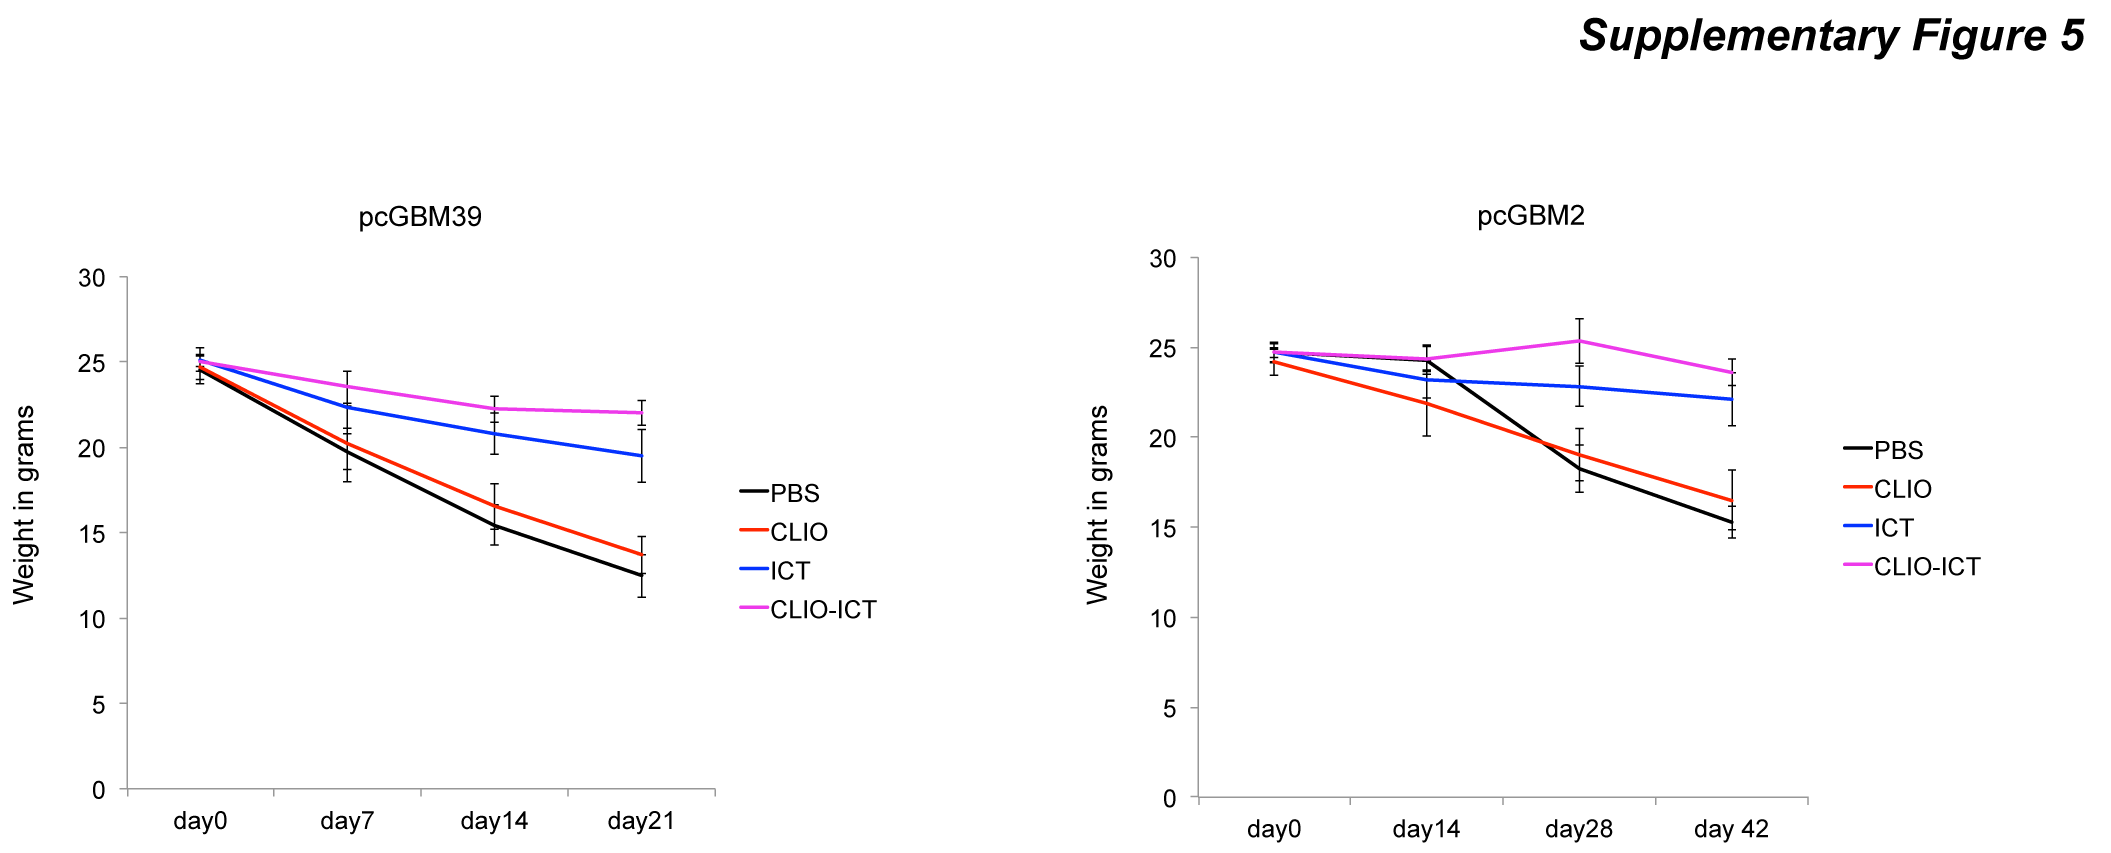
**

**Supplementary figure 5. Effect of CLIO-ICT on mouse body weight.** Mice were intracranially injected with pcGBM39 and pcGBM2 cells and treated with CLIO-ICT (0.5 mmol Fe/kg and 80mg/kg of ICT), ICT (80mg/kg of ICT), CLIO (0.5 mmol Fe/kg) or vehicle. Graph represents change in mouse body weight during treatment duration. *P < 0.05, respectively, n *=* *8*, one-way ANOVA
