# Supplementary material for: A Novel Theranostic Strategy for MMP-14 –Expressing Glioblastomas Impacts Survival
Source: Oxford University Press journal article supplement (doi:10.1158/1535-7163.mct-17-0022), 2017-06-28
Supplement: 15357163mct170022-sup-177031_2_supp_4084463_fr50zx.docx [file 15357163mct170022-sup-177031_2_supp_4084463_fr50zx.docx]

**
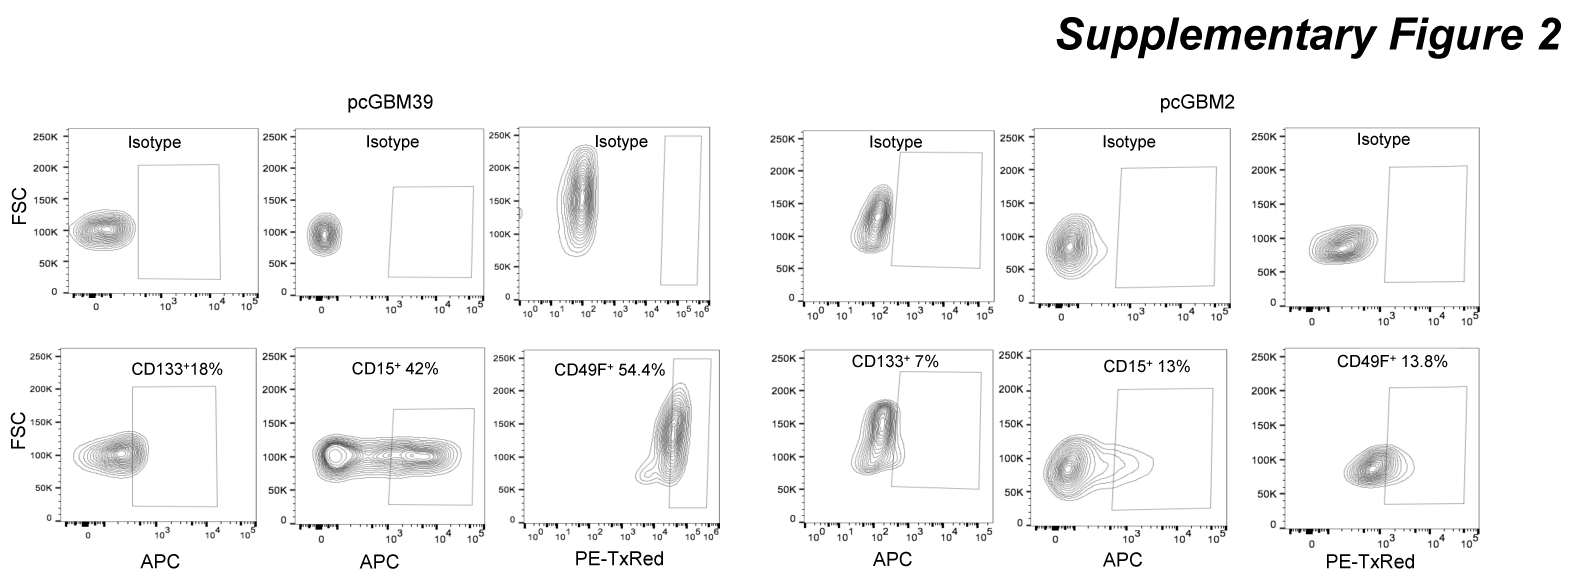
**

**Supplementary figure 2. Flowcytometric characterization of GICs in pcGBM39 and pcGBM2.** Flow cytometry analysis of GIC surface markers (CD133, CD15 and CD49F) in pcGBM39 and pcGBM2 cells. Contour plot represent percentages of CD133+, CD15+ and CD49Fhi cells along with their respective isotype controls.
